# Supplementary material for: Characterization of Human Medullary Thyroid Carcinoma Glycosphingolipids Identifies Potential Cancer Markers
Source: MDPI journal article supplement (doi:10.3390/ijms221910463), 2021-09-28
Supplement: s1 [file s1]

## SUPPLEMENTARY MATERIAL

### Characterization of Human Medullary Thyroid Carcinoma Glycosphingolipids Identifies Potential Cancer Markers

Karin Säljö, Anders Thornell, Chunsheng Jin, Olov Norlén, and Susann Teneberg

#### Supplementary figures

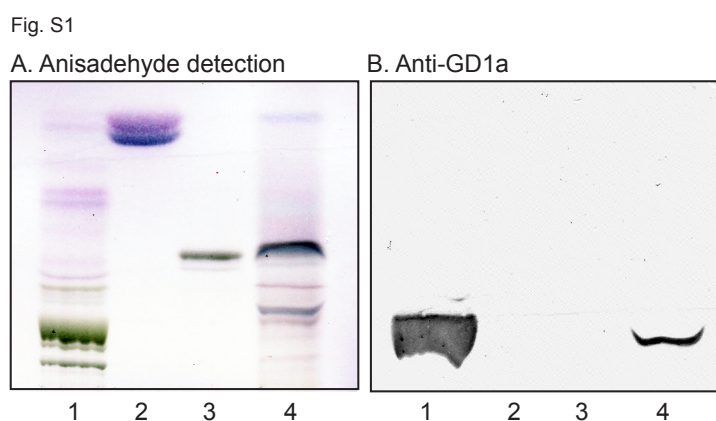

**Supplementary Figure S1.** Binding of monoclonal anti-GD1a antibodies to the acid glycosphingolipids from human medullary thyroid cancer. Thin-layer chromatogram after detection with anisaldehyde (A), and autoradiogram obtained by binding of monoclonal anti-GD1a antibodies (B). The lanes were: lane 1, calf brain gangliosides , 40  $\mu$ g; lane 2, sulfatide ( $\text{SO}_3\text{-3Gal}\beta\text{1Cer}$ ), 4  $\mu$ g; lane 3, GM3 ganglioside ( $\text{Neu5Ac}\alpha\text{3Gal}\beta\text{4Glc}\beta\text{1Cer}$ ), 4  $\mu$ g; acid glycosphingolipids from human medullary thyroid cancer, 40  $\mu$ g.

Fig. S2

|                    |                                              |                                       |                                       |                                                                 |                       |
|--------------------|----------------------------------------------|---------------------------------------|---------------------------------------|-----------------------------------------------------------------|-----------------------|
| A. <i>m/z</i> 706  | HexNAc-O- <br>220<br>C <sub>1</sub>          | Hex-O- <br>382<br>C <sub>2</sub>      | 4Hex-O- <br>544<br>C <sub>3</sub>     | 4Hex                                                            | Globotetra            |
| B. <i>m/z</i> 706  | Hex-O-4HexNAc-O- <br>382<br>C <sub>2</sub>   | Hex-O- <br>544<br>C <sub>3</sub>      | 4Hex                                  |                                                                 | Neolactotetra         |
| C. <i>m/z</i> 852  | Hex-O-4HexNAc-O- <br> <br>O<br> <br>Fuc      | Z <sub>3β</sub> 528<br>C <sub>2</sub> | 690<br>C <sub>3</sub>                 | 4Hex                                                            | Le <sup>x</sup> penta |
| D. <i>m/z</i> 852  | Fuc-O-Hex-O- <br>325<br>C <sub>2</sub>       | 4HexNAc-O- <br>528<br>C <sub>3</sub>  | Hex-O- <br>690<br>C <sub>4</sub>      | 4Hex                                                            | H type 2 penta        |
| E. <i>m/z</i> 909  | HexNAc-O-HexNAc-O- <br>423<br>C <sub>2</sub> | 4Hex-O- <br>585<br>C <sub>3</sub>     | 4Hex-O- <br>747<br>C <sub>4</sub>     | 4Hex                                                            | Forssman              |
| F. <i>m/z</i> 909  | HexNAc-O-Hex-O- <br>382<br>C <sub>2</sub>    | 4HexNAc-O- <br>585<br>C <sub>3</sub>  | Hex-O- <br>747<br>C <sub>4</sub>      | 4Hex                                                            | x2 penta              |
| G. <i>m/z</i> 998  | Fuc-O-Hex- <br>325<br>C <sub>2α</sub>        | O-4HexNAc-O- <br> <br>O<br> <br>Fuc   | Z <sub>3β</sub> 836<br>C <sub>4</sub> | 4Hex                                                            | Le <sup>y</sup> hexa  |
| H. <i>m/z</i> 1055 | HexNAc-O-Hex-O- <br> <br>O<br> <br>Fuc       | 4HexNAc-O- <br>528<br>C <sub>2</sub>  | Hex-O- <br>731<br>C <sub>3</sub>      | 4Hex<br>893<br>C <sub>4</sub>                                   | A type 2 hexa         |
| I. <i>m/z</i> 1201 | HexNAc-O-Hex-O- <br> <br>O<br> <br>Fuc       | 4HexNAc-O- <br>528<br>C <sub>2α</sub> | 3<br> <br>O<br> <br>Fuc               | Z <sub>3β</sub> 877<br>C <sub>3</sub><br>1039<br>C <sub>4</sub> | A type 2 hepta        |

**Supplementary Figure S2.** Interpretation formulas for Figure 3 and Figure 5.

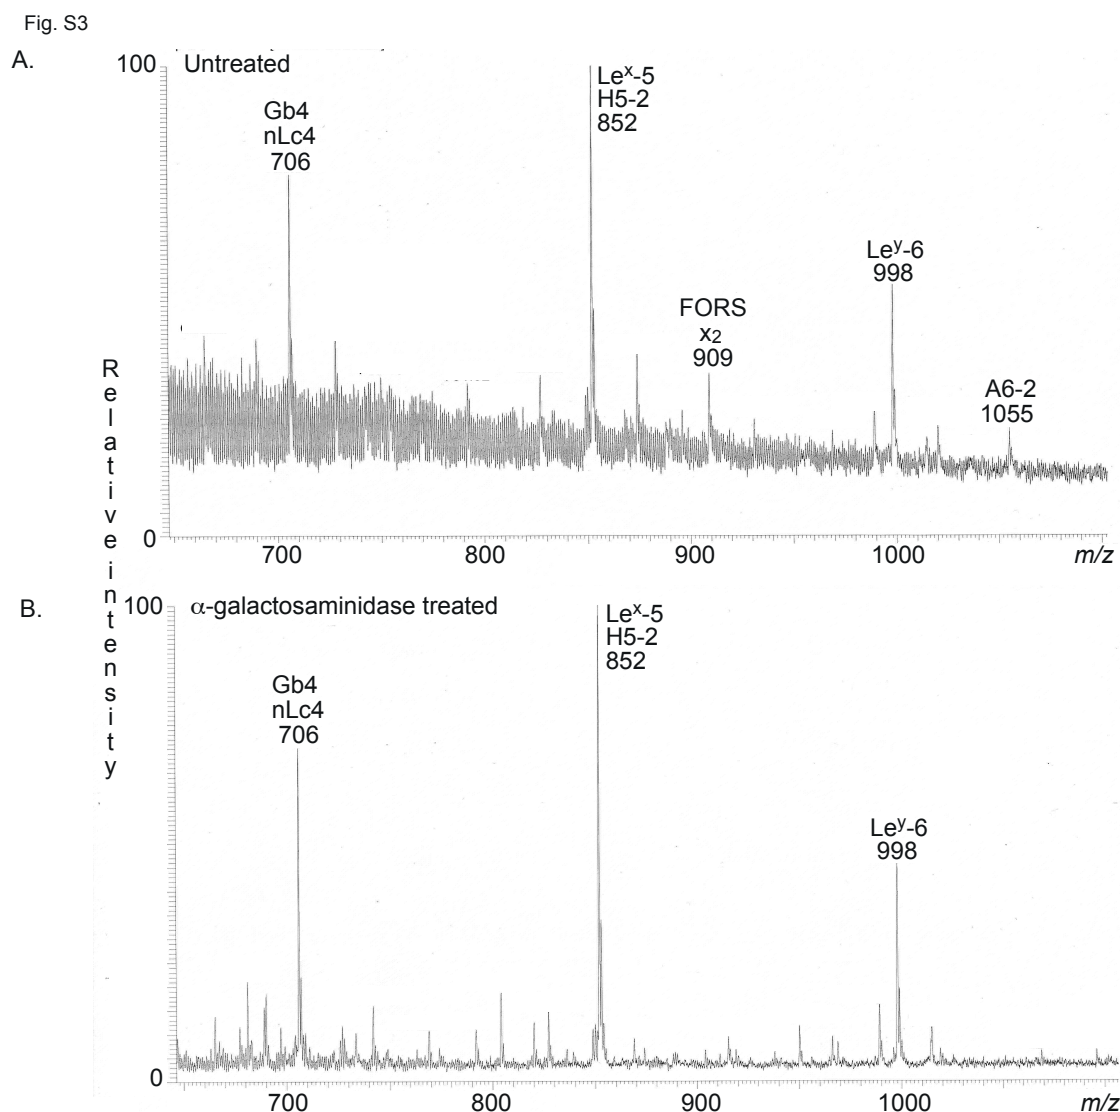

**Supplementary Figure S3.**  $\alpha$ -N-acetylgalactosaminidase hydrolysis of the oligosaccharides derived from the total non-acid glycosphingolipid fraction from human medullary thyroid cancer by hydrolysis with endoglycoceramidase II from *Rhodococcus* spp. (A) Molecular ion profile from LC-ESI/MS of the untreated oligosaccharides. (B) Molecular ion profile from LC-ESI/MS of the oligosaccharides after  $\alpha$ -galactosaminidase hydrolysis.

The oligosaccharides identified in the chromatogram were: Gb4, GalNAc $\beta$ 3Gal $\alpha$ 4Gal $\beta$ 4Glc; nLc4, Gal $\beta$ 4GlcNAc $\beta$ 3Gal $\beta$ 4Glc; Le<sup>x</sup>-5, Gal $\beta$ 4(Fuc $\alpha$ 3)GlcNAc $\beta$ 3Gal $\beta$ 4Glc; H5-2, Fuc $\alpha$ 2Gal $\beta$ 4GlcNAc $\beta$ 3Gal $\beta$ 4Glc; FORS, GalNAc $\alpha$ 3GalNAc $\beta$ 3Gal $\alpha$ 4Gal $\beta$ 4Glc; x<sub>2</sub>, GalNAc $\beta$ 3Gal $\beta$ 4GlcNAc $\beta$ 3Gal $\beta$ 4Glc; Le<sup>y</sup>-6, Fuc $\alpha$ 2Gal $\beta$ 4(Fuc $\alpha$ 3)GlcNAc $\beta$ 3Gal $\beta$ 4Glc.

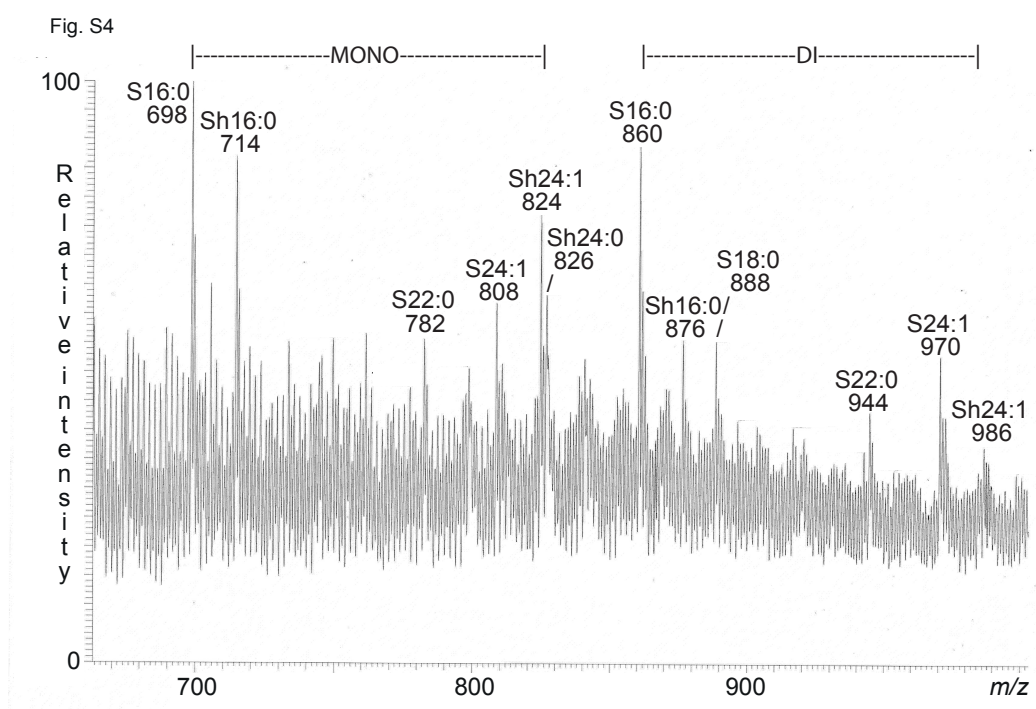

**Supplementary Figure S4.** Molecular ion profile from LC-ESI/MS of fraction T1. In the shorthand nomenclature for fatty acids and bases, the number before the colon refers to the carbon chain length and the number after the colon gives the total number of double bonds in the molecule. Fatty acids with a 2-hydroxy group are denoted by the prefix h before the abbreviation, as *e.g.* h16:0. S designates sphingosine (d18:1) long chain base.

## Supplementary tables

**Supplementary Table S1.** Glycosphingolipid preparations

|                          | Dry weight | Total acid glycosphingolipids | Total non-acid glycosphingolipids | mg acid glyco-sphingolipids/g dry weight | mg non-acid glyco-sphingolipids/g dry weight |
|--------------------------|------------|-------------------------------|-----------------------------------|------------------------------------------|----------------------------------------------|
| Medullary thyroid cancer | 5.4 g      | 84.4 mg                       | 24.4 mg                           | 15.6                                     | 4.5                                          |

**Supplementary Table S2.** Carbohydrate binding ligands used in chromatogram binding assays.

| Ligand                      | Clone       | Manufacturer              | Dilution | Binding specificity                                                               |
|-----------------------------|-------------|---------------------------|----------|-----------------------------------------------------------------------------------|
| Anti-sialyl-Le <sup>a</sup> | 116-NS-19-9 | Thermo Fischer            | 1:30     | Neu5Ac $\alpha$ 3Gal $\beta$ 3(Fuc $\alpha$ 4)GlcNAc                              |
| Anti-GD1a                   | GD1a-1      | Merck Millipore;          | 1:100    | Neu5Ac $\alpha$ 3Gal $\beta$ 3GalNAc $\beta$ 4(Neu5Ac $\alpha$ 3)Gal $\beta$ 4Glc |
| <i>H. pomatia</i> lectin    | -           | Sigma-Aldrich             | -        | GalNAc $\alpha$                                                                   |
| Anti-blood group A          | HE-195      | Sigma-Aldrich             | 1:500    | GalNAc $\alpha$ 3(Fuc $\alpha$ 2)Gal                                              |
| Anti-blood group H type 2   | A583        | DakoCytomation Norden A/S | 1:100    | Fuc $\alpha$ 2Gal $\beta$ 4GlcNAc                                                 |
| Anti-Lewis <sup>x</sup>     | P12         | Merck Millipore           | 1:100    | Gal $\beta$ 4(Fuc $\alpha$ 3)GlcNAc                                               |
| Anti-Lewis <sup>y</sup>     | F3          | Merck Millipore           | 1:100    | Fuc $\alpha$ 2Gal $\beta$ 4(Fuc $\alpha$ 3)GlcNAc                                 |
| Anti-Forssman               | M1/87       | Santa Cruz                | 1:100    | GalNAc $\alpha$ 3GalNAc $\beta$ 3Gal $\alpha$ 4Gal $\beta$ 4Glc                   |
| Anti-GloboH                 | VK9         | eBioscience/Invitrogen    | 1:100    | Fuc $\alpha$ 2Gal $\beta$ 3GalNAc $\beta$ 3Gal $\alpha$ 4Gal $\beta$ 4Glc         |

**Supplementary Table S3.** Characteristics of patients studied by immunohistochemistry

| Patient No. | Number of sections | Blood group | Tumor type                              | Hereditary         |
|-------------|--------------------|-------------|-----------------------------------------|--------------------|
| 1           | 2                  | A(Rh+)      | Primary tumor                           | MEN2A <sup>a</sup> |
| 2           | 4                  | O(Rh+)      | Lymf node metastasis                    | -                  |
| 3           | 1                  | B(Rh+)      | Lymf node metastasis                    | MEN2B <sup>b</sup> |
| 4           | 2                  | O(Rh+)      | Primary tumor +<br>Lymf node metastasis | -                  |
| 5           | 1                  | A(Rh+)      | Primary tumor                           | -                  |

<sup>a</sup>Multiple neuroendocrine neoplasia type 2A

<sup>b</sup>Multiple neuroendocrine neoplasia type 2B
